1 **Proximate causes of infertility and embryo mortality in captive zebra finches**

2 **Yifan Pei<sup>1</sup> , Wolfgang Forstmeier<sup>1\*</sup> , Daiping Wang<sup>1</sup> , Katrin Martin<sup>1</sup>, Joanna**  
3 **Rutkowska<sup>2</sup> , Bart Kempnaers<sup>1</sup> **

4 <sup>1</sup> Department of Behavioural Ecology and Evolutionary Genetics, Max Planck Institute for  
5 Ornithology, 82319 Seewiesen, Germany

6 <sup>2</sup> Institute of Environmental Sciences, Faculty of Biology, Jagiellonian University, 30387 Krakow,  
7 Poland

8

9 Keywords: inbreeding, senescence, early nutrition, reproductive failure, reproductive wastage,  
10 fertility, fecundity, lifespan, quantitative genetics, sexual antagonism

11 Figures & Tables: 5 figures, 2 tables

12 Supplementary materials: Supplementary methods, 8 figures, 11 tables

13

14 Address for correspondence:

15 Wolfgang Forstmeier<sup>\*</sup>, Department of Behavioural Ecology and Evolutionary Genetics, Max  
16 Planck Institute for Ornithology, Eberhard-Gwinner-Str. 7, 82319 Seewiesen, Germany, Phone:  
17 0049-8157-932346

18 Email: [forstmeier@orn.mpg.de](mailto:forstmeier@orn.mpg.de)

19

20 ORCID iDs:

21 Yifan Pei  <https://orcid.org/0000-0002-2411-4454>

22 Wolfgang Forstmeier  <https://orcid.org/0000-0002-5984-8925>

23 Daiping Wang  <https://orcid.org/0000-0002-9045-051X>

24 Joanna Rutkowska  <https://orcid.org/0000-0003-0396-1790>

25 Bart Kempnaers  <https://orcid.org/0000-0002-7505-5458>

26

27

28 **Data accessibility**

29 Supporting data, model structures and R scripts can be found in the Open Science Framework  
30 at <https://osf.io/tgsz8/>.

31 **Authors' contributions**

32 W.F. and B.K. designed and planned the study. W.F., D.W. and K.M. collected reproductive  
33 performance data. Y.P. and W.F. analyzed the data with inputs from J.R. Y.P., W.F. and B.K.  
34 interpreted the results and wrote the manuscript with inputs from J.R. All authors contributed to  
35 the final manuscript.

36 **Competing interests**

37 We have no competing interests.

38 **Funding**

39 This research was supported by the Max Planck Society (to B.K.). Y.P. was part of the  
40 International Max Planck Research School for Organismal Biology.

41 **Acknowledgements**

42 We thank M. Schneider for molecular work, H. Schielzeth, E. Bolund, M. Ihle, U. Knief, C.  
43 Burger, S. Janker, J. Schreiber, T. Aronson, and A. Edme for help with data collection, T.  
44 Birkhead, T. Krause, J. Lesku, and K. Roberts for providing birds, and S. Bauer, E. Bodendorfer,  
45 J. Didsbury, A. Grötsch, J. Hacker, A. Kortner, J. Minshull, P. Neubauer, C. Scheicher, F.  
46 Weigel, and B. Wörle for animal care and help with breeding.

## 47 **Abstract**

48 Some species show high rates of reproductive failure, which is puzzling because natural  
49 selection works against such failure in every generation. Hatching failure is common in both  
50 captive and wild zebra finches (*Taeniopygia guttata*), yet little is known about its proximate  
51 causes. Here we analyze data on reproductive performance (fate of >23,000 eggs) based on up  
52 to 14 years of breeding of four captive zebra finch populations. We find that virtually all aspects  
53 of reproductive performance are negatively affected by inbreeding (mean  $r = -0.117$ ), by an  
54 early-starting, age-related decline (mean  $r = -0.132$ ), and by poor early-life nutrition (mean  $r = -$   
55  $0.058$ ). However, these effects together explain only about 3% of the variance in infertility,  
56 offspring mortality, fecundity and fitness. In contrast, individual repeatability of different fitness  
57 components varied between 15% and 50%. As expected, we found relatively low heritability in  
58 fitness components (median: 7% of phenotypic, and 29% of individually repeatable variation).  
59 Yet, some of the heritable variation in fitness appears to be maintained by antagonistic  
60 pleiotropy (negative genetic correlations) between male fitness traits and female and offspring  
61 fitness traits. The large amount of unexplained variation suggests a potentially important role of  
62 local dominance and epistasis, including the possibility of segregating genetic incompatibilities.

63

## 64 **Introduction**

65 Reproductive performance, including offspring survival, is subject to strong directional selection  
66 in every generation. Such strong selection works not only on individuals that live in their natural  
67 habitat, but also on those that live in captivity, unless artificial selection counters it. Thus, it is

68 puzzling that some populations (or species) have substantial difficulties with successful  
69 reproduction, shown as high rates of infertility or embryo mortality. Prominent examples of  
70 frequent reproductive failure include humans (De Braekeleer and Dao 1991; Sierra and  
71 Stephenson 2006; Miyamoto et al. 2012), and other animals both in natural environments (Lyon  
72 1986; Grossen et al. 2012) and in captive conditions (Ayalon 1978; Bunin et al. 2008; Gwaza et  
73 al. 2016; Griffith et al. 2017). Given that directional selection constantly removes genetic  
74 variants that lead to poor performance, one might suspect that reproductive failure typically  
75 results from inbreeding (Briskie and Mackintosh 2004), because selection against recessive  
76 deleterious mutations is inefficient, or from environmental factors (Jurewicz et al. 2009), such  
77 as pollutants (Jackson et al. 2011). However, the range of possible explanations is much wider.

78

79 Reproductive failure and individual survival are complex traits and hence may be influenced by  
80 multiple genetic components that can be evolutionary stable. For instance, reproductive failure  
81 and mortality may be caused by selfish genetic elements that are self-promoting at the cost of  
82 organismal fitness (Sandler et al. 1959; Lyon 1986; Safronova and Chubykin 2013; Lindholm et  
83 al. 2016). Additive genetic variants can also be preserved under intra-locus sexual antagonism,  
84 where genes that are beneficial to one sex impose detrimental effects on the other (Foerster et  
85 al. 2007; Van Doorn 2009; Innocenti and Morrow 2010). Furthermore, there might be  
86 evolutionary trade-offs between traits, such that individuals that invest more in reproduction  
87 might show lower survival rates (Stearns 1989; Schluter et al. 1991). A few recent genetic and  
88 genomic studies detected genetic variants (e.g. specific genes) involved in dominance effects or  
89 rare variants that show main effects on reproductive traits (e.g. Christians et al. 2000;

90 Safronova and Chubykin 2013; Kim et al. 2017; Knief et al. 2017). As an extreme example, a  
91 balanced lethal system was identified in crested newts *Triturus cristatus*, where all embryos  
92 that are homozygous for chromosome 1 (about 50% of all embryos) die during development  
93 (Sims et al. 1984; Grossen et al. 2012).

94

95 Despite the development of new genomic tools, it remains difficult to identify and examine the  
96 genetic components that show antagonistic effects, or involve more than one locus, i.e. intra-  
97 and inter-locus genetic incompatibilities (Dobzhansky 1936; Fishman and Willis 2006; Johnson  
98 2008; Eroukmanoff et al. 2016). This difficulty is likely due to the complexity of interactions  
99 between multiple loci and between the genotype and the environment (Carrell and Aston 2011;  
100 Krausz and Riera-Escamilla 2018). If animals in captivity show high rates of reproductive failure  
101 because they are not adapted to a given artificial environment, selection can act on the  
102 standing genetic variance. This would result in a transient phase where fitness is heritable until  
103 the population is better able to cope with the new environment (e.g. due to behavioural and  
104 physiological adaptations to captivity). In general, the genetic basis of reproductive failure and  
105 variation in survival remains largely unclear in most species.

106

107 The zebra finch is a good model species to study how survival and reproductive performance of  
108 the two sexes are correlated at the additive genetic level. The zebra finch is a short-lived  
109 songbird that easily breeds in captivity (Zann 1996), and its reproductive performance varies  
110 extensively among individuals under controlled breeding conditions in both domesticated and

111 recently wild-derived populations (Griffith et al. 2017; Wang et al. 2017). In the wild, the rate of  
112 hatching failure (infertile eggs and dead embryos) was estimated to be >15% (table 1). This  
113 excludes clutches that failed completely, because nest desertion cannot be ruled out as the  
114 reason of failure. In lab stocks, the average proportion of eggs remaining apparently  
115 unfertilized ranged from 17% in aviary breeding to 30-35% in cage breeding (table 1), while  
116 average embryo mortality rates varied between 24% and 75% (table 1). Average nestling  
117 mortality rates were also high (table 1). Although some of the variation has been explained by  
118 specific treatment effects (e.g. inbreeding, force-pairing, maternal stress; Hemmings et al. 2012;  
119 Ihle et al. 2015; Khan et al. 2016), the high baseline levels of infertility, embryo and nestling  
120 mortality remain largely unexplained.

121

122 To better understand this variation in reproductive performance and individual survival, we  
123 here report on a comprehensive quantitative genetic analysis of lifespan, fecundity, infertility,  
124 offspring mortality and other fitness-related traits that cover most phases of reproduction for  
125 the two sexes (table 2). We quantified the effects of inbreeding, age and an individual's early  
126 nutritional condition on all measured aspects of reproductive performance and survival.

127

128 Wild zebra finches have a remarkably large effective population size (Balakrishnan and Edwards  
129 2009), where inbreeding is almost completely absent (Knief et al. 2015a). In contrast, in  
130 captivity, mating between related individuals is practically inevitable in the long run (Knief et al.  
131 2015a). The level of inbreeding typically correlates negatively with individual fitness and various

132 morphological and life-history traits, even though the estimated effect sizes can vary widely  
133 (Charlesworth and Charlesworth 1987; Keller and Waller 2002; Bolund et al. 2010a; Forstmeier  
134 et al. 2012; Hemmings et al. 2012; Hoffman et al. 2014; Huisman et al. 2016; Michaelides et al.  
135 2016). The importance of inbreeding in predicting reproductive failure remains largely unclear.

136

137 Ageing, or senescence, typically leads to a decline in reproductive function at old age, e.g. in  
138 birds (Bouwhuis et al. 2009; Lecomte et al. 2010) and humans (Speroff 1994; Shirasuna and  
139 Iwata 2017). In zebra finches breeding in cages, male and female fertility declined when  
140 individuals became older (Knief et al. 2017). More generally, the relationship between age and  
141 reproductive performance is often quadratic, with an initial increase in performance due to  
142 gained experience that may mask any early-starting decline caused by deterioration of the body  
143 (Harely 1990; Bouwhuis et al. 2009; Lecomte et al. 2010).

144

145 The conditions that an individual experienced during early development may also affect fitness  
146 later in life. Such permanent environmental effects have been demonstrated using brood size  
147 manipulations and they may affect individual behavior and reproductive investment (Gorman  
148 and Nager 2004; Tschirren et al. 2009; Rickard et al. 2010; Boersma et al. 2014). In zebra finches,  
149 being raised in enlarged broods apparently did not affect later performance (Tschirren et al.  
150 2009). However, a non-experimental measure of individual early-growth condition, namely  
151 body mass measured at 8 days of age (which ranges from 2-12 grams), had a significant but  
152 small effect on fitness later in life (Bolund et al. 2010b).



153

154 For this study, we used systematically recorded data on individual body mass at 8 days of age  
155 and on reproductive parameters and survival for four captive populations of zebra finches with  
156 an error-free pedigree. The aims of this study were (1) to estimate and compare the relative  
157 importance of inbreeding, early nutritional condition and age on reproductive performance and  
158 lifespan, (2) to estimate the relative importance of individual and pair identity (i.e. repeatability)  
159 on reproductive performance, (3) to quantify the heritability of individual reproductive  
160 performance and (4) to test if some of the heritable components can be maintained by  
161 antagonistic pleiotropy, by analyzing the additive genetic correlations between reproductive  
162 performance traits and lifespan across the two sexes.

163

## 164 **Methods**

165 Zebra finches are opportunistic breeders that are abundant throughout most of Australia.  
166 Individuals become sexually mature around the age of 90 days and then form pairs for life  
167 through mutual mate choice. Breeding pairs cooperatively incubate and raise nestlings until  
168 they reach independence around the age of 35 days (Zann 1996). Captive zebra finches live for  
169 about 4.5 years on average and maximally for 10 years (Zann 1996, our unpublished data). The  
170 studied zebra finches originated from four populations held at the Max Planck institute for  
171 Ornithology, Seewiesen, Germany. The population background, rearing conditions and breeding  
172 seasons have been detailed elsewhere (see also the online appendix, tables A1 and A2). In brief,  
173 we compiled and analyzed up to 14 years of zebra finch reproductive performance data from

174 (1) population 'Seewiesen', a domesticated population derived from the University of Sheffield,  
175 with a nine-generation long error-free pedigree (population #18 in Forstmeier et al. (2007b));  
176 (2) population 'Krakow', a domesticated population that was generated by hybridizing between  
177 Krakow (#11 in Forstmeier et al. (2007b)) and Seewiesen populations;  
178 (3) population 'Bielefeld', which was derived from the wild in the late 1980s (#19 in Forstmeier  
179 et al. (2007b));  
180 (4) population 'Melbourne', which was derived from the wild in the early 2000s (see Jerónimo  
181 et al. (2018)).

182 Birds from the two recently wild-derived populations were smaller (ca. 11g) compared to  
183 domesticated birds (ca. 15-16g), and more shy, so we only bred them in large semi-outdoor  
184 aviaries (rather than in small cages, see table 2 for sizes of cage and aviary).

185 Between 2004-2017, we bred zebra finches in four settings with various treatments (see tables  
186 A1 and A2 for details): (1) cage breeding, (2) cage laying, (3) aviary breeding, and (4) aviary  
187 laying. In cages, single pairs were kept and hence partners were assigned. In aviaries, groups of  
188 birds were kept together and individuals could freely form pairs. Group size was typically 12,  
189 but ranged from 10 to 42, with sex ratio (proportion of males) ranging from 0.4 to 0.6. In a  
190 'breeding' setup, pairs were allowed to rear their offspring, whereas in a 'laying' setup all eggs  
191 were collected for paternity assignment and replaced by plastic eggs that were removed after 7  
192 or 10 days of incubation. The proportion of individuals that participated in more than one  
193 breeding season ranged from 0.23-0.84 (mean 0.47).

194 In this study, we focus on general effects on reproductive performance in zebra finches, not on  
195 population-specific effects. Therefore, in all analyses, we only controlled statistically for  
196 between-population differences in reproductive performance (main effects only, no  
197 interactions).

198

### 199 ***Measures of the focal fixed effects: inbreeding, age and early nutrition***

200 We used the pedigree-based inbreeding coefficient ' $F_{ped}$ ', calculated using the R package  
201 'pedigree' V1.4 (Coster 2015), as a measure of the degree of inbreeding of an individual (Wright  
202 1922; Knief et al. 2015a).  $F_{ped}$  reflects the proportion of an individual's genome that is expected  
203 to be identical by descent (Howrigan et al. 2011; Knief et al. 2015a). For instance, full-sibling  
204 mating produces inbred offspring that are expected to have 25% of the genome identical by  
205 descent ( $F_{ped} = 0.25$ ). For practical reasons, all founders were assumed to be unrelated ( $F_{ped} = 0$ ;  
206 Forstmeier et al. 2004). However, their true level of identity by descent is likely about 5%  
207 (judging from runs of homozygosity; Knief et al. 2015a).

208

209 For all birds, we recorded their exact hatch date. Thus, for models of reproductive performance  
210 at the level of eggs, clutches, and breeding rounds (as the unit of analysis), we used the exact  
211 age (in days) of the female or the male when an egg was laid, a clutch started, or a breeding  
212 round started, respectively. At the start of reproduction, individuals were 69-2909 days old.

213

214 On the day of hatching, we individually marked all nestlings on the back using water-proof  
215 marker pens (randomly using red, blue and green, and pairwise combinations of these colors  
216 if >3 nestlings). We checked survival almost daily (daily on weekdays, occasionally during  
217 weekends) until offspring became independent (age 35 days). As a measure of early-growth  
218 condition, we determined body mass of each nestling to the nearest 0.1 g at 8 days of age  
219 (hereafter 'condition'). Despite the fact that high-quality food was available to all parents *ad*  
220 *libitum*, nestling body mass at this age ranged from about 1.5 g to 12.6 g (mean = 7.1 ± 1.7 SD).  
221 For 297 out of 6190 nestlings, body mass was measured on day 6, 7 or 9. For those individuals,  
222 we estimated their mass on day 8, as follows. We constructed a linear mixed-effect model, with  
223 nestling body mass as the dependent variable, with the actual age of the mass measurement as  
224 a continuous covariate and with  $F_{ped}$  and population (1-4, see above) as fixed effects. We also  
225 included the identity of the genetic mother as a random effect. Using the slope of daily mass  
226 gain, we estimated mass at day 8 for those 297 individuals by adding or subtracting 0.97 g per  
227 day of measuring too early or late. Because the four populations differ in body mass, we  
228 normalized (Z-scaled) all measured or estimated values of mass at day 8 within each population  
229 before further analysis.

230

231 We report effects of inbreeding, age and early condition always with a negative sign, such that  
232 negative values of greater magnitude reflect stronger detrimental effects of being inbred, old,  
233 or poorly fed. This allows to meta-summarize the results and to directly compare the strength  
234 of the focal fixed effects on reproductive performance.

235

236 ***Measures of lifespan and reproductive performance traits***

237 Table 2 provides an overview of all traits included in this study. To allow direct comparison and  
238 easy interpretation of the fixed effects and additive genetic correlations, we scored all traits  
239 such that higher, positive values reflect better reproductive performance.

240

241 Lifespan was analyzed in the following subset of birds: 5 generations of birds from the  
242 Seewiesen population (referred to as generations P, F1-F3, and S3, N = 1855 individuals) and 4  
243 generations of birds from the Bielefeld population (F1-F4, N = 1067 individuals). Among those  
244 birds, we used the 4 most complete generations P and F1-F3 Seewiesen for which we recorded  
245 the exact lifespan for all (N = 1175 individuals) as a pool to impute missing lifespans. For 219 S3  
246 Seewiesen birds and for 663 Bielefeld birds, no date of natural death was available (e.g.  
247 because individuals were still alive or because their fate was unknown). For these individuals,  
248 we used imputed life expectancy in all analyses, defined as the average lifespan of individuals  
249 from the same pool that lived longer than the focal bird when last observed alive.

250

251 In aviaries, we identified social pairs by behavior (clumping, allopreening, and visiting a nest  
252 together). All parentage assignments were based on conventional microsatellite genotyping,  
253 following Forstmeier et al. (2007a). We assigned every fertilized egg to its genetic mother (N =  
254 11704 eggs). When the egg appeared infertile (no visible embryo; Birkhead et al. 2008), we  
255 assigned it to the social female that was attending the clutch (N = 3630 cases). In 36 cases  
256 where two females used the same nest to lay eggs, we assigned the unfertilized eggs to the

257 female that laid the most similar eggs (in size and shape), based on eggs that were certainly laid  
258 by a given female (e.g. fertilized eggs and eggs in other clutches laid by that female). In cases  
259 where birds were not allowed to rear offspring, we quantified female fecundity as the total  
260 number of eggs laid by the focal female during the breeding period (see table A1 and A2).

261

262 In breeding experiments, we opened all unhatched eggs to check for visible signs of embryo  
263 development and classified them as either infertile or ‘embryo mortality’. In experiments in  
264 which all eggs were incubated artificially for a few days to collect DNA from embryos, we  
265 classified eggs as infertile or not, but discarded information on embryo viability. Visual  
266 inspection of opened eggs has the disadvantage that early embryo mortality may get  
267 misclassified as infertility if it occurred before any visible signs of development.

268 Misclassification cannot be avoided entirely, even with more time-consuming examination of  
269 eggs, which would be challenging to do for thousands of eggs (Bellairs and Osmond 2005;  
270 Birkhead et al. 2008; Murray et al. 2013). However, most cases of apparent infertility coincided  
271 with the absence of sperm on the perivitelline layer of the egg (fig. A1, see also Birkhead and  
272 Fletcher (1998)). Thus, we expect only a small fraction of misclassification.

273

274 In cages, we measured male fertility as a binary trait, i.e. whether an egg was fertilized or not.  
275 In 12 cases, one to five eggs (median: 1 egg) were fertilized by the previous partner of the  
276 female and those were counted as infertile eggs of the focal male. In aviaries, we assessed  
277 fertility by whether an egg that was laid by a male’s social partner was sired by him or not. Thus,

278 in aviary conditions, fertility also reflects a male's ability to defend his paternity against extra-  
279 pair males. We also quantified male siring success as the total number of fertilized eggs sired by  
280 a focal male. This includes males that remained unpaired (without a social female).

281

282 For each fertilized egg that was incubated by the social parents, we recorded whether it  
283 hatched or not (binomial trait for the genetic parents). For each hatched egg that was reared,  
284 we recorded whether the nestling survived to independence (day 35; binomial trait for the  
285 social parents). We quantified the number of seasonal recruits as the number of genetic  
286 offspring that survived to independence within a given breeding season. Number of seasonal  
287 recruits was square-root transformed to approach normality.

288

### 289 ***Statistical models***

290 All mixed-effect models were run in R, using the R packages 'lme4' V 1.1-18-1 (Bates et al. 2018).  
291 All animal models were run using VCE6 (Neumaier and Groeneveld 1998), because (a) it allows  
292 running a 12-trait multivariate animal model that consists of 2346 individuals with at least one  
293 trait value per individual and (b) it has a reasonable running time. To check the consistency of  
294 model outputs, we repeated all animal models in the R packages 'pedigreemm' V 0.3-3  
295 (Vazquez et al. 2010; univariate animal models only) and 'MCMCglmm' (Hadfield 2015;  
296 univariate and bivariate animal models). All model details are listed with the supporting data  
297 and R scripts at <https://osf.io/tgsz8/>. Model outputs of all methods are given in the online  
298 appendix. The heritability and additive genetic correlation estimates were highly correlated

299 between methods ( $r > 0.65$ ,  $P < 0.002$ ). We report the VCE6 estimates, unless otherwise stated.  
300 Figure A2 shows the exact range of each focal fixed effect and each performance trait value.  
301 Here, we Z-transformed all covariates and response variables across populations to allow direct  
302 comparison of the effect sizes for inbreeding, age and condition across all models. The 95% CIs  
303 of fixed effects from mixed-effect models were calculated using the function 'glht' from the R  
304 package 'multcomp' V1.4-10 while controlling for multiple testing (Hothorn et al. 2008).

305

306 Data analysis involved four consecutive steps (fig. 1):

307

308 *Step 1: Estimation of fixed effects and variance decomposition*

309 The goal of Step 1 was to estimate (a) all fixed effects on reproductive performance and (b)  
310 individual repeatability of performance traits. All fixed and random effects of models used in  
311 Step 1 are listed in tables A3-A4. In brief, we first fitted all models with a Gaussian error  
312 distribution to compare and meta-summarize the estimated effect sizes of the fixed effects and  
313 to estimate the variance components for the random effects. We used all observations with  
314 information on the three fixed effects (age,  $F_{ped}$ , and early condition of the male, female and  
315 the individual egg if applicable), and included population (fixed effect) and female, male, and  
316 pair identity (random effects). We analyzed traits that were measured at either egg, clutch, or  
317 season level. As applicable, we fitted as fixed effects the laying sequence of eggs within a clutch,  
318 the order of hatching of offspring within a brood, the order of the clutches that were laid by a  
319 female over the course of a season, the sex ratio in the aviary, and the duration of the season



320 (table A1). For models of embryo survival, we also controlled for whether or not the eggs were  
321 incubated in a nest that still contained offspring from a previous brood (7% of embryos). For  
322 models of nestling survival, we added as fixed effect pair type (pair formed through mate  
323 choice or through force-pairing; Ihle et al. 2015). For models of egg-based fertility, embryo and  
324 nestling survival, we also tested the effect of egg volume on egg fate (we calculated volume as  
325  $V = \left(\frac{1}{6}\right)\pi Width^2 Length$  where egg length and width had been measured to the nearest 0.1  
326 mm). For this analysis, we fitted the mean egg volume of each female and the centered egg  
327 volumes (centered within individual females) to distinguish between the effects of between-  
328 and within-female variation in egg size (van de Pol and Wright 2009). We estimated the  
329 variance components for male, female, and pair identity, and further controlled for clutch  
330 identity and identity of the setup (see appendix tables A1-A2), as applicable, by adding them as  
331 random effects. Lifespan had no repeated measurement, therefore we only included individual  
332 identity as a dummy random effect for practical reasons when running the model and  
333 extracting estimates in R. For this ‘lm’ model, the correlation between the residuals and the  
334 dummy random effect equals one, and the fixed effect estimates were unaffected by the  
335 dummy variable. Table 2 shows for which group of individuals, i.e. female, male or the offspring  
336 itself, we tested which focal fixed and random effects.

337

338 To allow direct comparison of the magnitude of fixed effects at the same level of measurement,  
339 we also aggregated data within clutches (e.g. proportion of infertile eggs within a clutch) and  
340 within individuals over the course of a season. Models on aggregated data were weighted by  
341 the number of eggs within a clutch or by the number of eggs or clutches for an individual within

342 a season (fig. 1). As expected, the proportion of variance explained by male, female and pair  
343 identity increased from the egg level to the season level (see Results). However, the relative  
344 proportions explained by female, male, and pair identity did not change notably. Therefore, we  
345 focus on the analyses of fixed effect estimates at the breeding season level.

346

347 To compare the overall effect sizes between the focal fixed effects, we meta-summarized the  
348 estimated effect sizes for inbreeding, age and condition using the weighted 'lmer' function from  
349 the R package 'lme4'. The uncertainty of each estimate was accounted for by using the  
350 multiplicative inverse of the standard error ( $\frac{1}{SE}$ ) of the response variable as 'weight'. In this  
351 meta-model, we used effect size estimates from models that had been aggregated at the  
352 season level as the dependent variable. Note that effects of inbreeding of the egg on fertility in  
353 cage-breeding and nestling survival were taken from egg-based models, because they cannot  
354 be aggregated by clutch or season. Additionally, we tested whether effect sizes differed  
355 between males, females and offspring (fixed effect with three levels) or among traits (random  
356 effect with 11 levels; as listed in table 2).

357

358 Additionally, we tested for early-starting ageing effects by selecting reproductive performance  
359 data for males and females that were <2 years old when reproducing. We then meta-  
360 summarized the mean age effect estimates using the R function 'lm', weighted by the  
361 multiplicative inverse of the standard error.

362

363 We calculated the amount of variance explained by each fixed effect (Nakagawa and Schielzeth  
364 2010) as the sum-of-squares of the fixed effect divided by the number of observations (N-1)  
365 (Henderson 1953). In weighted models, we divided the variance components of the fixed  
366 effects and the residual by the mean weight value (Bates et al. 2018).

367

368 *Step 2: Estimation of heritability of fitness-related traits*

369 The goal of Step 2 was to estimate the heritability of reproductive performance traits using  
370 univariate Gaussian animal models. Because quantitative genetic models require large amounts  
371 of data, we restrict our analyses to the populations Seewiesen and Bielefeld. Note that the  
372 pedigrees of our four captive populations are not connected, so it was not useful to analyze  
373 them jointly.

374

375 We kept the general model structure from Step 1, but excluded the fixed effects of egg volume  
376 on male fertility, embryo and offspring survival (to avoid removing biological variation that is  
377 potentially heritable and hence of interest; note that the effect sizes of egg volume are small,  
378 see Results). For the embryo survival model, we excluded the non-significant fixed effects of  
379 male age, inbreeding, and condition. For the model on male fertility from cage-breeding, we  
380 excluded the non-significant effect of the level of inbreeding of the egg itself. To most  
381 effectively use the available information on reproductive performance, we included individuals  
382 with missing values for condition (N = 231 founder individuals and N = 23 individuals of the F2  
383 generation; i.e. 7% of Seewiesen birds). These missing values were replaced by the population

384 mean. Individual identity was fitted twice, once linked to the individual correlation matrix  
385 (pedigree) to estimate the amount of variance from additive genetic effects ( $V_A$ ) and once to  
386 estimate the remaining amount of variance from permanent environmental effects ( $V_{PE}$ ) (Kruuk  
387 and Hadfield 2007). Animal models on nestling mortality were run twice, once for the mother  
388 and once for the father. We calculated heritability based on the total phenotypic variance,  $V_{Ph}$ ,  
389 as  $h^2 = (V_A/V_{Ph})$ , and we also quantified  $V_A$  relative to the individual repeatability as  
390  $(V_A/(V_A+V_{PE}))$ .

391

392 We compared the estimates of heritability (and  $V_A$  relative to the individual repeatability),  
393 between the domesticated population 'Seewiesen' and the recently wild-derived population  
394 'Bielefeld' using the R function 'lmer'. We used the multiplicative inverse of the standard error  
395 as 'weight' to control for variation in uncertainty of each estimate. We used the estimates of  
396 heritability as the response variable, and fitted population as fixed effect (two levels) and trait  
397 as a random effect (9 levels, only including traits that were measured in both populations).

398

399 *Step 3: Calculation of mean individual fitness-related traits values using BLUPs*

400 The only goal of Step 3 was to extract individual estimates of reproductive performance needed  
401 for Step 4. We kept the model structure from Step 1, except that we used a binomial error  
402 structure for binary traits, i.e. male fertility in cages and aviaries, embryo and nestling survival.  
403 Missing values for condition (mostly founders of each population, 6% of all birds of the four  
404 populations) were replaced with population means as in Step 2. For the embryo survival model,

405 we again excluded the non-significant effects of male inbreeding, age, and condition. We also  
406 excluded (a) effects of egg volume from all egg-based models and (b) the effect of the level of  
407 inbreeding of the egg itself from the model of male fertility measured in cages (see Step 2).

408

409 We extracted the best linear unbiased predictions (BLUPs) for female or male identity (as  
410 applicable) as the estimated life-history trait value of that individual (table 2) for Step 4.

411

#### 412 *Step 4: Estimation of additive genetic correlations*

413 The goal of Step 4 was to estimate additive genetic correlations between different performance  
414 traits using multivariate animal models.

415

416 Before fitting a 12-trait animal model that estimates for each matrix (genetic and residual) all  
417 12 variances and 66 covariances simultaneously, we aggregated the raw data to one phenotypic  
418 value per individual for each trait. This was necessary because we are not aware of software  
419 that can handle the full complexity of the underlying raw data (involving more than 26 different  
420 fixed effects). Because simple averages of multiple measures can result in outliers when sample  
421 size is small, we used the phenotypic BLUPs described above. BLUPs do not produce outliers  
422 and account for all considered fixed and random effects (Robinson 1991; Houslay and Wilson  
423 2017). Breeding values (genetic BLUPs) suffer from non-independence, because the phenotype  
424 of one individual influences the breeding values of all its relatives (Hadfield et al. 2010). Note  
425 that this is not the case for the phenotypic BLUPs we use here. However, the uncertainty that is

426 inherent to each BLUP is not taken into account, which may lead to underestimation of  
427 standard errors (Houslay and Wilson 2017). To check the robustness of our results, we  
428 compared our estimates with those obtained (a) using a smaller dataset from another  
429 population ('Bielefeld') with the same method and (b) using bivariate animal models in  
430 'MCMCglmm' V 2.26 (Hadfield 2015) (population 'Seewiesen'). The latter approach is  
431 presumably less powerful than a full 12-trait animal model.

432

433 For each of the 12 traits, we fitted an intercept, and the pedigree as the only random effect to  
434 separate additive genetic from residual variance. We ran these models for the largest and most  
435 comprehensive dataset (population Seewiesen; N = 2346 individuals with at least one trait  
436 value, BLUPs for 12 traits, 66 covariances) and for the more limited dataset (population  
437 Bielefeld; N = 1134 individuals, BLUPs for 9 traits, 36 covariances; see Results).

438

439 We used the weighted 'lm' function in the R package 'stats' to summarize the estimated  
440 additive genetic correlations within and between the major categories of traits, i.e. female,  
441 male, offspring traits, and lifespan for each population separately (table 2). We fitted the  
442 estimates of additive genetic correlations (for each pair of traits, weighted by the multiplicative  
443 inverse of the standard error of each estimate) as the dependent variable with trait-class  
444 combination as a predictor with seven levels. We removed the intercept to estimate the mean  
445 additive genetic correlation for each pairwise combination of classes. We then computed the  
446 eigenvectors of the additive genetic variance-covariance matrix of traits, using the R function

447 'eigen', and visualized the orientation of the traits in the additive genetic variation space  
448 defined by the principle components PC1 and PC2.

449

## 450 **Results**

### 451 ***Effects of laying and hatching order, clutch order and egg volume on egg and embryo fate***

452 The fate of an egg and its embryo depended on the order of laying within a clutch, the order of  
453 hatching within a brood, and the order of consecutive clutches within a breeding season (fig. A3;  
454 table A3, models at the 'Egg' level). First-laid eggs in a clutch were significantly more likely to be  
455 infertile or to contain a dead embryo. Fertility and embryo viability were the highest for the 3<sup>rd</sup>  
456 egg (fig. A3). Male fertility significantly increased over the first three clutches and stayed high  
457 afterwards. In contrast, clutch order did not affect the probability of embryo and nestling  
458 survival.

459 The average effect of egg volume on measures of egg fate was small (mean  $r = 0.040 \pm 0.016$  SE,  
460 fig. A4). Effects of egg volume were largest for nestling survival after hatching, and smallest for  
461 embryo survival (table A3, fig. A4). Despite large sample size ( $N = 9,785$  eggs), embryo survival  
462 was not significantly influenced by egg volume (between-female variation:  $r = 0.015 \pm 0.017$  SE,  $P$   
463  $= 0.37$ ; within-female variation:  $r = 0.018 \pm 0.010$  SE,  $P = 0.08$ ; table A3). Additionally, embryos in  
464 clutches that were incubated in the presence of nestlings from previous breeding attempts  
465 were more likely to die before hatching ( $b = 0.192 \pm 0.048$  SE,  $P < 0.0001$ ; table A3). Overall, the  
466 total amount of variance explained by laying and hatching order, clutch order and egg volume  
467 on egg fate was less than 5% (table A4).

468

469 ***Effects of inbreeding, age, and early condition***

470 Individuals performed worse in virtually all studied reproductive traits when they were more  
471 inbred, as they became older and when they weighed less at 8 days of age (figs. 2, A2 and A5,  
472 table A3). Interestingly, reproductive performance did not show an initial increase at young age  
473 (meta-summarized effect size of age among birds younger than 2 years:  $r = -0.013 \pm 0.011$  SE,  
474 figs. 2C, F, 3 and A2). Inbred eggs were equally likely to be infertile than outbred eggs, while  
475 inbred embryos and offspring were more likely to die (fig. 3C). Together, this suggests that most  
476 infertile eggs were not cases of undetected early embryo mortality. Individuals lived shorter  
477 when they were inbred and when they had low weight at day 8 (fig. 3, table A3). However, the  
478 fixed effects of inbreeding, age and condition together explained on average only 2% of the  
479 variance across all traits (fig. 4 and table A5).

480

481 Meta-summarized effect sizes of inbreeding ( $r = -0.117 \pm 0.024$  SE) and age ( $r = -0.132 \pm 0.032$  SE)  
482 were similar in magnitude, and were about twice as large as the remarkably small effect of  
483 early condition ( $r = -0.058 \pm 0.029$  SE; fig. 3 and table A4). There was no significant difference  
484 between the categories male, female, and offspring in how strongly they were affected by  
485 these three factors ( $b \leq 0.012 \pm 0.028$  SE,  $P = 0.63$ ; table A4). Fitting trait (fitness component, 11  
486 levels) as a random effect explained 1.5% of the variance in effect sizes ( $P = 0.02$ ; table A4),  
487 suggesting that some components might be less sensitive than others (fig. 3; table A3). Female  
488 traits significantly predicted offspring survival and male fertility (independent of whether they



489 were measured in a cage or in an aviary), whereas male traits showed no effect on offspring  
490 survival (fig. 3).

491

#### 492 ***Variance components and heritability***

493 Variance components for all reproductive performance traits are shown in fig. 4 (see also table  
494 A4). Overall, individual reproductive performance traits were significantly repeatable (median  $R$   
495 = 0.28, range: 0.15-0.50). Female reproductive performance traits (clutch size, fecundity, and  
496 female seasonal recruits) showed reasonably high repeatability for individual females ( $R \sim 0.26$ -  
497 0.40). Likewise, male fertility, male siring success, and male seasonal recruits were highly  
498 repeatable for individual males ( $R \sim 0.24$ -0.50). Female reproductive traits from aviary-breeding  
499 were analyzed independently of whether the focal female had a partner or not (table 2), but  
500 female clutch size measured in a cage showed no contribution from the male partner or from  
501 pair identity. In contrast, male fertility depended on all three random effects, and was  
502 repeatable for males ( $R > 0.23$ ,  $P < 0.0001$ ), but less so for females ( $R < 0.18$ ,  $P < 0.1$ ), and for the  
503 particular pair combinations ( $R < 0.23$ ,  $P < 0.05$ ). The model on embryo survival showed  
504 significant female and pair identity (genetic parents) effects that were similar in size (both  $R =$   
505 0.20,  $P < 0.0002$ ), while genetic male identity explained no variance (fig. 4). In contrast, social  
506 female ( $R = 0.17$ ,  $P = 0.017$ ) and social male ( $R = 0.15$ ,  $P = 0.039$ ) identity explained significant  
507 amounts of the variance in nestling survival, while the effect of pair identity (parents that raised  
508 the brood) was less clear ( $R = 0.14$ ,  $P = 0.11$ ).

509

510 Reproductive performance traits and lifespan in general had low narrow-sense heritability  
511 ( $V_A/V_{Ph}$ ; Seewiesen: median  $h^2 = 0.07$ ; Bielefeld: median  $h^2 = 0.11$ ) and explained only a limited  
512 amount of the individual repeatability ( $V_A/(V_A+V_{PE})$ ; Seewiesen: median = 0.29; Bielefeld:  
513 median = 0.32; see all heritability estimates in tables A6-A7). Heritability estimates from the  
514 recently wild-derived population 'Bielefeld' were similar to those from the domesticated  
515 'Seewiesen' population (for 9 traits measured in both populations; mean difference in  $h^2 = 0.02$ ,  
516 range: -0.10 - 0.13, meta-summarized difference after controlling for the uncertainty of each  
517 estimate:  $\Delta b < 0.0001$ ; mean difference in  $V_A/(V_A+V_{PE}) = 0.20$ , range: -0.13 - 0.68, meta-  
518 summarized difference:  $\Delta b = 0.0002$ ; table A8).

519

### 520 ***Additive genetic correlations***

521 Reproductive performance traits were grouped into three classes: (1) aspects of male  
522 reproductive performance, (2) aspects of female reproductive performance and (3) aspects of  
523 offspring survival (table 2). Traits within each of these classes were on average positively  
524 correlated with each other at the additive genetic level (for the Seewiesen population, female  
525 traits: mean  $r_A = 0.66$ ,  $P < 0.0001$ ; male traits: mean  $r_A = 0.67$ ,  $P < 0.0001$ ; offspring survival traits:  
526 mean  $r_A = 0.36$ ,  $P = 0.09$ ; see fig. 5A). Results for the Bielefeld population are in fig. A6. The  
527 meta-summarized results are given in table A9 and all additive genetic correlation estimates are  
528 listed in tables A10-A11. Estimates of the additive genetic correlations from bivariate animal  
529 models using MCMCglmm are in fig. A7 (Seewiesen) and A8 (Bielefeld).

530

531 Male and female reproductive performance traits were weakly negatively correlated at the  
532 additive genetic level (mean  $r_A = -0.14$ ,  $P = 0.04$ ; see 'MF' in figs. 5A, A7A). Accordingly, the  
533 eigenvectors for male and female fitness traits were pointing into different directions (figs. 5B,  
534 A7B). This pattern was somewhat consistent between the Seewiesen and Bielefeld populations  
535 (see figs. A6, A8 for Bielefeld population). However, the negative correlation between male and  
536 female fitness traits was no longer significant when estimated by the bivariate animal models in  
537 'MCMCglmm', and disappeared in the 'Bielefeld' dataset (table A9). The orientation of offspring  
538 survival traits relative to male and female fitness traits was less consistent. In the Seewiesen  
539 population, female fitness traits were positively correlated with offspring survival traits at the  
540 additive genetic level (mean  $r_A = 0.61$ ,  $P < 0.0001$ ), while male fitness traits were not aligned  
541 with offspring survival traits (mean  $r_A = -0.11$ ,  $P = 0.24$ ; fig. 5). In contrast, in the Bielefeld  
542 population, both female and male fitness traits were positively correlated with offspring  
543 survival traits (fig. A6). Lifespan tended to be positively correlated with all reproductive  
544 performance traits (Seewiesen: mean  $r_A = 0.19$ ,  $P = 0.02$ ; Bielefeld: mean  $r_A = 0.60$ ,  $P = 0.0006$ ;  
545 figs. 5, A6; table A9).

546

## 547 **Discussion**

### 548 ***Effects of inbreeding, age, and early condition***

549 Many studies have shown that inbreeding depression significantly influences morphological,  
550 behavioral, and fitness-related traits in zebra finches (Bolund et al. 2010a; Forstmeier et al.  
551 2012; Hemmings et al. 2012; Opatová et al. 2016), and in other species (Amos et al. 2001; Reed

552 and Frankham 2003; Williams et al. 2003; Michaelides et al. 2016). This study confirms that  
553 inbreeding negatively influenced all phases of offspring survival, reproductive performance and  
554 lifespan. We found that the level of inbreeding of both genetic parents negatively influenced  
555 egg fertility, suggesting that this is not only a matter of sperm functionality (Opatova et al.  
556 2016), but also of female reproductive performance (e.g. egg quality or copulation behavior).  
557 Male and female fitness estimates (seasonal recruits) were most strongly affected by  
558 inbreeding (fig. 3), presumably because the successful rearing of offspring to independence  
559 requires proper functionality at every step of reproduction.

560

561 Age effects on reproductive performance typically show an initial increase in performance both  
562 in short- and in long-lived species (e.g. in great tits *Parus major* (Bouwhuis et al. 2009), Langur  
563 monkeys *Presbytis entellus* (Harely 1990), red deer *Cervus elaphus* (Pemberton et al. 2009),  
564 albatrosses *Diomedea exulans* (Lecomte et al. 2010), and bustards *Chlamydotis undulata*  
565 (Preston et al. 2011)). Interestingly, in our captive zebra finches we found that reproductive  
566 performance (especially male fertility, female clutch size, fecundity, and female effects on  
567 embryo survival) did not show an initial increase after birds reached sexual maturity at about  
568 100 days of age (figs. 2C, F, A2). This could be because zebra finches are short-lived  
569 opportunistic breeders that reach sexual maturity earlier compared to most other birds (Zann  
570 1996). Thus, zebra finches might have been selected to perform best early on. Alternatively,  
571 this effect may not be present in the wild, where experience might play a more important role  
572 in determining reproductive success.

573

574 Over the past decades, numerous studies focused on how early developmental conditions  
575 affect behavior, life history, and reproductive performance later in life (Tschirren et al. 2009;  
576 Rickard et al. 2010; Boersma et al. 2014). Here, we show that even dramatic differences in early  
577 growth conditions of surviving offspring (see range of x-axis in fig. 2B), have remarkably small  
578 (though statistically significant) effects on adult reproductive performance.

579

580 Overall, the proportion of variance explained by inbreeding, age, and early condition  
581 (characteristics of conditions) was less than 3% (fig. 4; table A4). This indicates that individuals'  
582 robustness against poor conditions appears more noteworthy than their sensitivity. As will be  
583 discussed in the following paragraphs, the majority of the individual repeatability in  
584 reproductive performance cannot be explained by such individual characteristics.

585

### 586 ***Repeatability and heritability of reproductive performance***

587 Individual zebra finches were remarkably repeatable in their reproductive performance. Our  
588 variance-partitioning analysis showed that infertility is largely a male-specific trait, whereas  
589 embryo and offspring survival are mostly related to female identity (fig. 4; table A4). The effects  
590 of pair identity on infertility and offspring mortality may reflect behavioral incompatibility,  
591 while the pair effect on embryo mortality more likely reflects genetic incompatibility (Ihle et al.  
592 2015).

593 Although male and female zebra finches are highly repeatable in their reproductive  
594 performance, the heritability of fitness traits was low and similar between the recently wild-

595 derived Bielefeld population and the domesticated Seewiesen population. Overall, our findings  
596 indicate that there are some additive genetic components underlying zebra finch reproductive  
597 performance.

598

### 599 ***Evidence for sexually antagonistic pleiotropy***

600 Some of the standing additive genetic variance in reproductive performance could be  
601 maintained by intra-locus sexual antagonism between male fitness traits and female (and  
602 offspring) fitness traits. This has for example also been suggested in studies on *Drosophila*  
603 (Innocenti and Morrow 2010) and on red deer (Foerster et al. 2007). We found that male  
604 fertility, siring success and seasonal recruitment were overall negatively correlated with female  
605 fitness and offspring survival traits, suggesting that alleles that increase male fitness tend to  
606 reduce female and offspring fitness (fig. 5). In contrast, lifespan and reproductive performance  
607 tended to be positively correlated at the additive genetic level, which is suggestive of some  
608 overall 'good gene variation' in our population (fig. 5). Some words of caution should be added  
609 to these observations. VCE6 (figs. 5, A6) yielded higher absolute values of estimates than those  
610 calculated with the R functions 'PedigreeMM' (heritability estimates only) and 'MCMCglmm'  
611 (see appendix figs. A7-A8; also see tables A6-A7, A10-A11). Nevertheless, the additive genetic  
612 correlation estimates are highly correlated between the two methods ( $r > 0.7$ ,  $P < 0.0001$ ; see  
613 tables A10-A11). Estimating genetic correlations between traits with low heritability requires  
614 large datasets, especially on additive genetic correlations of between-sex reproductive  
615 performance where the traits of male fertility and female clutch size in cages are missing (N  
616 performance traits: Seewiesen = 12, Bielefeld = 9; N birds have at least one entry of

617 reproductive performance data: Seewiesen = 2346, Bielefeld = 1134; hence these results are  
618 presented in the online appendix only, fig. A6). Despite this lack of power in our second largest  
619 data set of population Bielefeld, its overall orientation of traits in the additive genetic variation  
620 space of the principle components PC1 and PC2 is very similar to population Seewiesen (note  
621 that lifespan is in the center of all fitness traits and that aspects of female fitness do not align  
622 with male fitness in figs. 5B, A6B, A7B, A8B).

623  
624 Individual repeatability of fitness-related traits could arise from permanent environmental  
625 effects (e.g. early developmental conditions and long-lasting diseases) or from genetic effects.  
626 However, while food-shortage experienced during early development (reflected in body mass  
627 at 8 days old) strongly predicted nestling mortality (our unpublished data), it only explained <1%  
628 of variation in reproductive performance (mean  $r = -0.058$ , figs. 2B, E, 3 and also 4). Additionally,  
629 our captive zebra finches were raised and kept in a controlled environment with no obvious  
630 diseases detected. Additive genetic effects explained only about 30% of the large remaining  
631 unexplained individual repeatability in fitness-related traits, suggesting that reproductive  
632 performance might be (predominantly) dependent on genetic effects of local over- or under-  
633 dominance and epistasis, i.e. incompatibility between loci. For instance, high levels of  
634 reproductive failure could be maintained when alleles show non-additive effects, with selection  
635 favouring the heterozygous genotype (see e.g. Sims et al. 1984; Grossen et al. 2012). In the  
636 zebra finch, males that are heterozygous for an inversion on the Z chromosome produced fast-  
637 swimming sperm and sired more offspring (Kim et al. 2017; Knief et al. 2017). Epistatic effects  
638 that involve several genes (e.g. incompatibility between nuclear loci, or between mitochondrial

639 and nuclear genomes) could be evolutionary stable when certain combinations of genotypes  
640 perform better than others, especially when combined with overdominance (Avent and Reid  
641 2000; Arntzen et al. 2009; Hermansen et al. 2014; Knecht et al. 2016; Baris et al. 2017; Stryjewski  
642 and Sorenson 2017).

643

644 Infertility, as one of the main and puzzling sources of reproductive failure, behaved as a male-  
645 specific trait that may in part also depend on behavioral compatibility between pair members  
646 (reflected in copulation behavior) and in part on the male's genotype at sexually antagonistic  
647 loci. The intrinsic male fertility, measured in a cage, i.e. in the absence of sperm competition,  
648 correlated negatively with all female and offspring survival traits at the additive genetic level  
649 ('sexual antagonism'; median  $r_A = -0.30$ , range: -0.45 to -0.01; fig. 5; table A10). In contrast, in  
650 the presence of sperm competition (aviary breeding), high male fertility, siring success and  
651 seasonal recruitment should also be influenced by the competitive ability of the individual and  
652 this could explain why these traits correlated positively with lifespan and trade-off less with  
653 female traits and offspring rearing ability at the additive genetic level (figs. 4, A6; tables A10-  
654 A11).

655

656 Embryo mortality, another main source of reproductive wastage, mostly depended on the  
657 identity of the genetic mother and the identity of the genetic pair members. A previous study  
658 using cross-fostering of freshly laid eggs also showed that embryo mortality is a matter of the  
659 genetic parents rather than the foster environment (Ihle et al. 2015). The female component



660 suggested an overall female genetic quality effect, yet with limited heritability (pointing  
661 towards dominance variance or epistasis). The effect of the combination of parents on embryo  
662 mortality might reflect an effect of the genotype of the embryo itself, possibly involving multi-  
663 locus incompatibilities.

664

## 665 **Conclusions**

666 Our results suggest that sexually antagonistic pleiotropy between male and female fitness plus  
667 offspring rearing traits may maintain some of the existing additive genetic variation in  
668 reproductive performance traits in captive zebra finches. Additionally, there appears to be  
669 some ‘good gene’ (heritable) variation among reproductive performance traits and individual  
670 lifespan, which suggests an ongoing adaptation to the captive environment. We found that the  
671 level of inbreeding, age and – to a lesser extent – early rearing conditions predicted a small, but  
672 statistically significant amount of variation in individual reproductive performance and lifespan.  
673 However, those three effects were so small that they cannot be the main causes of  
674 reproductive failure. Although individual zebra finches were moderately repeatable in their  
675 reproductive performance, the heritability of those traits was low. Overall, our results suggest  
676 that alleles that have additive effects on fitness might be maintained through sexually  
677 antagonistic pleiotropy, and the major genetic causes of reproductive failure might be  
678 determined by genetic incompatibilities or local dominance effects.

679

## 680 **References**

- 681 Amos, W., J. Worthington Wilmer, K. Fullard, T. M. Burg, J. P. Croxall, D. Bloch, and T. Coulson. 2001. The influence  
682 of parental relatedness on reproductive success. *Proceedings of the Royal Society B: Biological Sciences*.
- 683 Arntzen, J. W., R. Jehle, F. Bardakci, T. Burke, and G. P. Wallis. 2009. Asymmetric viability of reciprocal-cross  
684 hybrids between crested and marbled newts (*triturus cristatus* and *T. marmoratus*). *Evolution* 63:1191–1202.
- 685 Avent, N. D., and M. E. Reid. 2000. The Rh blood group system: a review. *Blood* 95:375–387.
- 686 Ayalon, N. 1978. A review of embryonic mortality in cattle. *Journal of reproduction and fertility* 54:483–493.
- 687 Balakrishnan, C. N., and S. V. Edwards. 2009. Nucleotide variation, linkage disequilibrium and founder-facilitated  
688 speciation in wild populations of the zebra finch (*Taeniopygia guttata*). *Genetics* 181:645–660.
- 689 Baris, T. Z., D. N. Wagner, D. I. Dayan, X. Du, P. U. Blier, N. Pichaud, M. F. Oleksiak, et al. 2017. Evolved genetic and  
690 phenotypic differences due to mitochondrial-nuclear interactions. *PLoS Genetics* 13:e1006517.
- 691 Bates, D., M. Maechler, B. Bolker, S. Walker, R. H. B. Christensen, H. Singmann, and et al. 2018. Package “lme4.” R  
692 Foundation for Statistical Computing, Vienna, Austria.
- 693 Bellairs, R., and M. Osmond. 2005. *The Atlas of Chick Development* (2nd ed.). Elsevier.
- 694 Birkhead, T. R., and F. Fletcher. 1998. Sperm transport in the reproductive tract of female zebra finches  
695 (*Taeniopygia guttata*). *Reproduction* 114:141–145.
- 696 Birkhead, T. R., J. Hall, E. Schut, and N. Hemmings. 2008. Unhatched eggs: Methods for discriminating between  
697 infertility and early embryo mortality. *Ibis*.
- 698 Boersma, G. J., T. L. Bale, P. Casanello, H. E. Lara, A. B. Lucion, D. Suchecki, and K. L. Tamashiro. 2014. Long-term  
699 impact of early life events on physiology and behaviour. *Journal of Neuroendocrinology* 26:587–602.
- 700 Bolund, E., K. Martin, B. Kempnaers, and W. Forstmeier. 2010a. Inbreeding depression of sexually selected traits  
701 and attractiveness in the zebra finch. *Animal Behaviour* 79:947–955.
- 702 Bolund, E., H. Schielzeth, and W. Forstmeier. 2010b. No heightened condition dependence of zebra finch  
703 ornaments - a quantitative genetic approach. *Journal of Evolutionary Biology* 23:586–597.
- 704 Bouwhuis, S., B. C. Sheldon, S. Verhulst, and A. Charmantier. 2009. Great tits growing old: selective disappearance  
705 and the partitioning of senescence to stages within the breeding cycle. *Proceedings of the Royal Society B:  
706 Biological Sciences* 276:2769–2777.
- 707 Briskie, J. V., and M. Mackintosh. 2004. Hatching failure increases with severity of population bottlenecks in birds.  
708 *Proceedings of the National Academy of Sciences* 101:558–561.
- 709 Bunin, J. S., I. G. Jamieson, and D. Eason. 2008. Low reproductive success of the endangered Takahe *Porphyrio  
710 mantelli* on offshore island refuges in New Zealand. *Ibis* 139:144–151.
- 711 Carrell, D. T., and K. I. Aston. 2011. The search for SNPs, CNVs, and epigenetic variants associated with the complex  
712 disease of male infertility. *Systems Biology in Reproductive Medicine*.
- 713 Charlesworth, D., and B. Charlesworth. 1987. Inbreeding Depression and its Evolutionary Consequences. *Annual  
714 Review of Ecology and Systematics* 18:237–268.
- 715 Christians, E., A. A. Davis, S. D. Thomas, and I. J. Benjamin. 2000. Maternal effect of *Hsf1* on reproductive success.  
716 *Nature* 407:693.
- 717 Coster, A. 2015. Package ‘pedigree.’
- 718 De Braekeleer, M., and T. N. Dao. 1991. Cytogenetic studies in male infertility: a review. *Hum Reprod* 6:245–250.
- 719 Dobzhansky, T. 1936. Studies on Hybrid Sterility. II. Localization of Sterility Factors in *Drosophila Pseudoobscura*  
720 Hybrids. *Genetics* 21:113–135.

- 721 Eroukhanoff, F., M. Rowe, E. R. A. Cramer, F. Haas, J. S. Hermansen, A. Runemark, A. Johnsen, et al. 2016.  
722 Experimental evidence for ovarian hypofunction in sparrow hybrids. *Avian Research* 7:3.
- 723 Fishman, L., and J. H. Willis. 2006. a Cytonuclear Incompatibility Causes Anther Sterility in *Mimulus* Hybrids.  
724 *Evolution* 60:1372.
- 725 Foerster, K., T. Coulson, B. C. Sheldon, J. M. Pemberton, T. H. Clutton-Brock, and L. E. B. B. Kruuk. 2007. Sexually  
726 antagonistic genetic variation for fitness in red deer. *Nature* 447:1107–1110.
- 727 Forstmeier, W., D. W. Coltman, and T. R. Birkhead. 2004. Maternal Effects Influence the Sexual Behavior of Sons  
728 and Daughters in the Zebra Finch. *Evolution* 58:2574–2583.
- 729 Forstmeier, W., H. Schielzeth, J. C. Mueller, H. Ellegren, and B. Kempnaers. 2012. Heterozygosity-fitness  
730 correlations in zebra finches: Microsatellite markers can be better than their reputation. *Molecular Ecology*  
731 21:3237–3249.
- 732 Forstmeier, W., H. Schielzeth, M. Schneider, and B. Kempnaers. 2007a. Development of polymorphic  
733 microsatellite markers for the zebra finch (*Taeniopygia guttata*). *Molecular Ecology Notes* 7:1026–1028.
- 734 Forstmeier, W., G. Segelbacher, J. C. Mueller, and B. Kempnaers. 2007b. Genetic variation and differentiation in  
735 captive and wild zebra finches (*Taeniopygia guttata*). *Molecular Ecology* 16:4039–4050.
- 736 Gorman, H. E., and R. G. Nager. 2004. Prenatal developmental conditions have long-term effects on offspring  
737 fecundity. *Proceedings of the Royal Society B: Biological Sciences*.
- 738 Griffith, S. C., O. L. Crino, S. C. Andrew, F. Y. Nomano, E. Adkins-Regan, C. Alonso-Alvarez, I. E. Bailey, et al. 2017.  
739 Variation in Reproductive Success Across Captive Populations: Methodological Differences, Potential Biases and  
740 Opportunities. *Ethology* 123:1–29.
- 741 Grossen, C., S. Neuenschwander, and N. Perrin. 2012. The balanced lethal system of crested newts: a ghost of sex  
742 chromosomes past? *The American Naturalist* 180:E174-83.
- 743 Gwaza, D. S., N. I. Dim, and O. M. Momoh. 2016. Evaluation of Sire and Dam for Genetic Improvement of Fertility,  
744 Embryonic Mortality and Hatchability in Nigerian Local Chickens Populations. *Advancements in Genetic  
745 Engineering* 05:147–153.
- 746 Hadfield, J. D. 2015. MCMC Methods for Multi-Response Generalized Linear Mixed Models: The MCMCglmm R  
747 Package. *Journal of Statistical Software*.
- 748 Hadfield, J. D., A. J. Wilson, D. Garant, B. C. Sheldon, and L. E. B. Kruuk. 2010. The Misuse of BLUP in Ecology and  
749 Evolution. *The American Naturalist* 175:116–125.
- 750 Harely, D. 1990. Aging and Reproductive Performance in Langur Monkeys (*Presbytis entellus*). *American Journal of  
751 Physical Anthropology* 83:253–261.
- 752 Hemmings, N. L., J. Slate, and T. R. Birkhead. 2012. Inbreeding causes early death in a passerine bird. *Nature  
753 Communications* 3:863.
- 754 Henderson, C. R. . 1953. Estimation of Variance and Covariance Components. *Biometric* 9:226–252.
- 755 Hermansen, J. S., F. Haas, C. N. Trier, R. I. Bailey, A. J. Nederbragt, A. Marzal, and G.-P. Saetre. 2014. Hybrid  
756 speciation through sorting of parental incompatibilities in Italian sparrows. *Molecular Ecology* 23:5831–5842.
- 757 Hoffman, J. I., F. Simpson, P. David, J. M. Rijks, T. Kuiken, M. a. S. Thorne, R. C. Lacy, et al. 2014. High-throughput  
758 sequencing reveals inbreeding depression in a natural population. *Proceedings of the National Academy of  
759 Sciences* 111:3775–3780.
- 760 Hothorn, T., F. Bretz, and P. Westfall. 2008. Simultaneous inference in general parametric models. *Biometrical  
761 Journal*.
- 762 Houslay, T. M., and A. J. Wilson. 2017. Avoiding the misuse of BLUP in behavioural ecology. *Behavioral Ecology*  
763 28:948–952.

- 764 Howrigan, D. P., M. A. Simonson, and M. C. Keller. 2011. Detecting autozygosity through runs of homozygosity: A  
765 comparison of three autozygosity detection algorithms. *BMC Genomics* 12:460.
- 766 Huisman, J., L. E. B. Kruuk, P. A. Ellis, T. Clutton-Brock, and J. M. Pemberton. 2016. Inbreeding depression across  
767 the lifespan in a wild mammal population. *Proceedings of the National Academy of Sciences of the United States of*  
768 *America* 113:3585–90.
- 769 Ihle, M., B. Kempnaers, and W. Forstmeier. 2015. Fitness Benefits of Mate Choice for Compatibility in a Socially  
770 Monogamous Species. *PLoS Biology* 13:1–21.
- 771 Innocenti, P., and E. H. Morrow. 2010. The sexually antagonistic genes of *Drosophila melanogaster*. *PLoS Biology*.
- 772 Jackson, A. K., D. C. Evers, M. A. Etterson, A. M. Condon, S. B. Folsom, J. Detweiler, J. Schmerfeld, et al. 2011.  
773 Mercury exposure affects the reproductive success of a free-living terrestrial songbird, the Carolina Wren  
774 (*Thryothorus ludovicianus*). *The Auk* 128:759–769.
- 775 Jerónimo, S., M. Khadraoui, D. Wang, K. Martin, J. A. Lesku, K. A. Robert, E. Schlicht, et al. 2018. Plumage color  
776 manipulation has no effect on social dominance or fitness in zebra finches. *Behavioral Ecology*.
- 777 Johnson, N. 2008. Hybrid Incompatibility and Speciation. *Nature Education* 1:20.
- 778 Jurewicz, J., W. Hanke, M. Radwan, and J. Bonde. 2009. Environmental factors and semen quality. *International*  
779 *Journal of Occupational Medicine and Environmental Health* 22:305–329.
- 780 Keller, L. F., and D. M. Waller. 2002. Inbreeding effects in wild populations. *Trends in Ecology and Evolution*  
781 17:230–241.
- 782 Khan, N., R. A. Peters, and K. Robert. 2016. Compensating for a stressful start: maternal corticosterone, offspring  
783 survival, and size at fledging in the Zebra Finch, *Taeniopygia guttata*. *Emu* 116:262–272.
- 784 Kim, K.-W., C. Bennison, N. Hemmings, L. Brookes, L. L. Hurley, S. C. Griffith, T. Burke, et al. 2017. A sex-linked  
785 supergene controls sperm morphology and swimming speed in a songbird. *Nature Ecology & Evolution* 1:1168–  
786 1176.
- 787 Knegt, B., T. Potter, N. A. Pearson, Y. Sato, H. Staudacher, B. C. J. Schimmel, E. T. Kiers, et al. 2016. Detection of  
788 genetic incompatibilities in non-model systems using simple genetic markers: hybrid breakdown in the  
789 haplodiploid spider mite *Tetranychus evansi*. *Heredity* 1–11.
- 790 Knief, U., W. Forstmeier, Y. Pei, M. Ihle, D. Wang, K. Martin, P. Opatová, et al. 2017. A sex-chromosome inversion  
791 causes strong overdominance for sperm traits that affect siring success. *Nature Ecology & Evolution* 1:1177–1184.
- 792 Knief, U., G. Hemmrich-Stanisak, M. Wittig, A. Franke, S. C. Griffith, B. Kempnaers, and W. Forstmeier. 2015a.  
793 Quantifying realized inbreeding in wild and captive animal populations. *Heredity* 114:397–403.
- 794 Knief, U., H. Schielzeth, H. Ellegren, B. Kempnaers, and W. Forstmeier. 2015b. A prezygotic transmission distorter  
795 acting equally in female and male zebra finches *Taeniopygia guttata*. *Molecular Ecology* 24:3846–3859.
- 796 Krausz, C., and A. Riera-Escamilla. 2018. Genetics of male infertility. *Nature Reviews Urology* 15:369–384.
- 797 Kruuk, L. E. B., and J. D. Hadfield. 2007. How to separate genetic and environmental causes of similarity between  
798 relatives. *Journal of Evolutionary Biology* 20:1890–1903.
- 799 Lecomte, V. J., G. Sorci, S. Cornet, A. Jaeger, B. Faivre, E. Arnoux, M. Gaillard, et al. 2010. Patterns of aging in the  
800 long-lived wandering albatross. *Proceedings of the National Academy of Sciences* 107:6370 LP – 6375.
- 801 Lindholm, A. K., K. A. Dyer, R. C. Firman, L. Fishman, W. Forstmeier, L. Holman, H. Johannesson, et al. 2016. The  
802 Ecology and Evolutionary Dynamics of Meiotic Drive. *Trends in Ecology and Evolution* 31:315–326.
- 803 Lyon, M. F. 1986. Male sterility of the mouse t-complex is due to homozygosity of the distorter genes. *Cell* 44:357–  
804 363.
- 805 Michaelides, S. N., G. M. While, N. Zajac, F. Aubret, B. Calsbeek, R. Sacchi, M. A. L. Zuffi, et al. 2016. Loss of genetic  
806 diversity and increased embryonic mortality in non-native lizard populations. *Molecular Ecology* 4113–4125.

- 807 Miyamoto, T., A. Tsujimura, Y. Miyagawa, E. Koh, M. Namiki, and K. Sengoku. 2012. Male Infertility and Its Causes  
808 in Human. *Advances in Urology* 2012.
- 809 Murray, J. R., C. W. Varian-Ramos, Z. S. Welch, and M. S. Saha. 2013. Embryological staging of the Zebra Finch,  
810 *Taeniopygia guttata*. *Journal of Morphology* 274:1090–1110.
- 811 Nakagawa, S., and H. Schielzeth. 2010. Repeatability for Gaussian and non-Gaussian data: A practical guide for  
812 biologists. *Biological Reviews*.
- 813 Neumaier, A., and E. Groeneveld. 1998. Restricted maximum likelihood estimation of covariances in sparse linear  
814 models. *Genetics Selection Evolution*.
- 815 Opatová, P., M. Ihle, J. Albrechtová, O. Tomášek, B. Kempnaers, W. Forstmeier, and T. Albrecht. 2016. Inbreeding  
816 depression of sperm traits in the zebra finch *Taeniopygia guttata*. *Ecology and Evolution*.
- 817 Pemberton, J. M., L. E. B. Kruuk, A. Morris, T. H. Clutton-Brock, M. N. Clements, and D. H. Nussey. 2009. Inter- and  
818 Intrasexual Variation in Aging Patterns across Reproductive Traits in a Wild Red Deer Population. *The American*  
819 *Naturalist* 174:342–357.
- 820 Preston, B. T., M. Saint Jalme, Y. Hingrat, F. Lacroix, and G. Sorci. 2011. Sexually extravagant males age more  
821 rapidly. *Ecology Letters* 14:1017–1024.
- 822 Reed, D. H., and R. Frankham. 2003. Correlation between fitness and genetic diversity. *Conservation Biology*.
- 823 Rickard, I. J., J. Holopainen, S. Helama, S. Helle, A. F. Russell, and V. Lummaa. 2010. Food availability at birth limited  
824 reproductive success in historical humans. *Ecology*.
- 825 Robinson, G. K. 1991. That BLUP Is a Good Thing: The Estimation of Random Effects. *Statistical Science* 6:15–51.
- 826 Romanoff, A. L. A. J., and A. L. A. J. Romanoff. 1972. Pathogenesis of the avian embryo: an analysis of causes of  
827 malformations and prenatal death. Wiley Interscience, New York.
- 828 Safronova, L. D., and V. L. Chubykin. 2013. Meiotic Drive in Mice Carrying t Complex in Their Genome 49:885–897.
- 829 Sandler, L., Y. Hiraizumi, and I. Sandler. 1959. Meiotic Drive in Natural Populations of *Drosophila Melanogaster*. I.  
830 the Cytogenetic Basis of Segregation-Distortion. *Genetics* 44:233–50.
- 831 Schluter, D., T. D. Price, and L. Rowe. 1991. Conflicting selection pressures and life history trade-offs. *Proceedings*  
832 *of the Royal Society B: Biological Sciences* 246:11–17.
- 833 Shirasuna, K., and H. Iwata. 2017. Effect of aging on the female reproductive function. *Contraception and*  
834 *reproductive medicine* 2:23.
- 835 Sierra, S., and M. Stephenson. 2006. Genetics of Recurrent Pregnancy Loss. *Seminars in Reproductive Medicine*  
836 24:17–24.
- 837 Sims, S. H., H. C. Macgregor, P. S. Pellatt, and H. A. Horner. 1984. Chromosome 1 in crested and marbled newts  
838 (*Triturus*) - An extraordinary case of heteromorphism and independent chromosome evolution. *Chromosoma*  
839 89:169–185.
- 840 Speroff, L. 1994. The effect of aging on fertility. *Current opinion in obstetrics & gynecology* 6:115–20.
- 841 Stearns, S. C. 1989. Trade-Offs in Life-History Evolution. *Functional Ecology*.
- 842 Stryjewski, K. F., and M. D. Sorenson. 2017. Mosaic genome evolution in a recent and rapid avian radiation. *Nature*  
843 *Ecology & Evolution* 1:1912–1922.
- 844 Tschirren, B., A. N. Rutstein, E. Postma, M. Mariette, and S. C. Griffith. 2009. Short- and long-term consequences of  
845 early developmental conditions: A case study on wild and domesticated zebra finches. *Journal of Evolutionary*  
846 *Biology* 128:103–115.
- 847 van de Pol, M., and J. Wright. 2009. A simple method for distinguishing within- versus between-subject effects  
848 using mixed models. *Animal Behaviour* 77:753–758.

- 849 Van Doorn, G. S. 2009. Intralocus sexual conflict. *Annals of the New York Academy of Sciences*.
- 850 Vazquez, A. I., D. M. Bates, G. J. M. Rosa, D. Gianola, and K. A. Weigel. 2010. Technical note: An R package for  
851 fitting generalized linear mixed models in animal breeding. *Journal of Animal Science*.
- 852 Wang, D., N. Kempenaers, B. Kempenaers, and W. Forstmeier. 2017. Male zebra finches have limited ability to  
853 identify high-fecundity females. *Behavioral Ecology* 28:784–792.
- 854 Williams, C. G., L. D. Auckland, M. M. Reynolds, and K. a Leach. 2003. Overdominant lethals as part of the conifer  
855 embryo lethal system. *Heredity* 91:584–92.
- 856 Wright, S. 1922. Coefficients of Inbreeding and Relationship Source. *The American Naturalist* 56:330–338.
- 857 Zann, R. 1996. *The Zebra Finch*.
- 858

859 **Table 1:** Summary of rates of hatching failure, infertility, and embryo and offspring mortality reported in the zebra finch literature

| Population                                                                       | Sample description                                                                                           | Hatching failure (%)          | Infertility (%)              | Embryo mortality (%)          | Nestling mortality (%) | Reference            |
|----------------------------------------------------------------------------------|--------------------------------------------------------------------------------------------------------------|-------------------------------|------------------------------|-------------------------------|------------------------|----------------------|
| Wild                                                                             | 1,156 eggs, clutches that produced no nestlings were removed                                                 | >17                           | -                            | -                             | -                      | Zann 1996            |
| Wild                                                                             | 872 eggs, clutches that produced no nestlings were removed                                                   | 16                            | -                            | -                             | 9                      | Griffith et al. 2008 |
| La Trobe University, Australia, domesticated                                     | 31 untreated and 25 CORT treated pairs, clutches that produced no nestlings and all first eggs were removed. | Untreated: 24;<br>treated: 45 | Untreated: 7;<br>treated: 15 | Untreated: 10;<br>treated: 29 | -                      | Khan et al. 2016     |
| Max Planck Institute for Ornithology, Germany, domesticated (from Sheffield, UK) | 11,617 eggs                                                                                                  | -                             | 30                           | -                             | -                      | Knief et al. 2015b   |

|                                                                                               |                                                                                  |    |                              |                               |                               |                      |
|-----------------------------------------------------------------------------------------------|----------------------------------------------------------------------------------|----|------------------------------|-------------------------------|-------------------------------|----------------------|
| Max Planck Institute for Ornithology, Germany recently wild-derived (from Bielefeld, Germany) | 852 eggs, aviary                                                                 | -  | 17                           | 24                            | 45                            | Ihle et al. 2015     |
| Sheffield University, UK                                                                      | 161 eggs for infertility; 2,884 eggs for hatching failure and nestling mortality | 52 | 35                           | -                             | 31                            | Kim et al. 2017      |
| Sheffield University, UK                                                                      | 1,524 eggs; 77 unrelated and 20 sib-sib pairs                                    | -  | Unrelated: 9;<br>sib-sib: 11 | Unrelated: 59;<br>sib-sib: 75 | Unrelated: 55;<br>sib-sib: 68 | Hemmings et al. 2012 |

---

Note: For population of La Trobe University, Australia, in treated pairs, females were given a corticosterone (CORT) mix after laying the first egg. The CORT mix was made of 0.5 mg crystalline corticosterone dissolved by 10  $\mu$ l ethanol then mixed with 990  $\mu$ l peanut oil (Khan et al. 2016). Hatching failure: proportion of eggs that do not hatch. Infertility: proportion of eggs that show no sign of development. Embryo mortality: proportion of fertilized eggs where the embryo died before hatching. Nestling mortality: proportion of nestlings that died before fledging.



861 **Table 2:** Description of reproductive performance traits in our zebra finch study

| Trait              | Fixed effects for | Random effects | BLUPs calculated for | Description                                                                                                                                                                                                                                                       |
|--------------------|-------------------|----------------|----------------------|-------------------------------------------------------------------------------------------------------------------------------------------------------------------------------------------------------------------------------------------------------------------|
| Female             |                   |                |                      |                                                                                                                                                                                                                                                                   |
| Clutch size cage   | Female            | Female         | Female               | The number of eggs that were consecutively laid by a single female in a cage (contains one male and one female), allowing for laying gaps of maximally 4 days between subsequent eggs. For 2% (65 out of 3694) clutches that had >7 eggs, they were counted as 7. |
| -                  | -                 | Male           | -                    |                                                                                                                                                                                                                                                                   |
| -                  | -                 | Pair           | -                    |                                                                                                                                                                                                                                                                   |
| Clutch size aviary | Female            | Female         | Female               | The number of eggs that were consecutively laid by a female in a communal breeding aviary, allowing for laying gaps of maximally 4 days between subsequent eggs. For 5% (173 out of 3663) clutches that had >7 eggs, they were counted as 7.                      |
| Fecundity aviary   | Female            | Female         | Female               | The total number of eggs laid by a female in a communal breeding aviary over the course of a breeding season (35-83 days), where no offspring rearing was allowed.                                                                                                |
| Seasonal recruits  | Female            | Female         | Female               | The total number of genetic offspring that survived to independence in a communal breeding aviary, i.e. age 35 days, within a breeding season (83-113 days for egg laying plus about 50 days for rearing).                                                        |

Male

Fertility cage

|        |        |      |                                                                                                       |
|--------|--------|------|-------------------------------------------------------------------------------------------------------|
| Female | Female | -    | Whether or not an egg was fertilized by the male in the cage (that contains one male and one female). |
| Male   | Male   | Male |                                                                                                       |
| -      | Pair   | -    |                                                                                                       |
| Egg    | -      | -    |                                                                                                       |

Fertility aviary

|        |        |      |                                                                                                           |
|--------|--------|------|-----------------------------------------------------------------------------------------------------------|
| Female | Female | -    | Whether or not an egg laid by the social partner of the male in a communal breeding aviary was fertilized |
| Male   | Male   | Male | by the male (extra-pair fertilizations count as not fertilized).                                          |
| -      | Pair   | -    |                                                                                                           |

Siring success

|      |      |      |                                                                                                                                 |
|------|------|------|---------------------------------------------------------------------------------------------------------------------------------|
| Male | Male | Male | The total number of eggs fertilized by a male in a communal breeding aviary over the course of a breeding season (35-113 days). |
|------|------|------|---------------------------------------------------------------------------------------------------------------------------------|

Seasonal recruits

|      |      |      |                                                                                                                                                                                                            |
|------|------|------|------------------------------------------------------------------------------------------------------------------------------------------------------------------------------------------------------------|
| Male | Male | Male | The total number of genetic offspring that survived to independence in a communal breeding aviary, i.e. age 35 days, within a breeding season (83-113 days for egg laying plus about 50 days for rearing). |
|------|------|------|------------------------------------------------------------------------------------------------------------------------------------------------------------------------------------------------------------|

---

Offspring

Embryo survival

|        |        |        |                                                                                                          |
|--------|--------|--------|----------------------------------------------------------------------------------------------------------|
| Female | Female | Female | Whether or not a fertilized egg that was incubated by an individual in a cage (contains one male and one |
|--------|--------|--------|----------------------------------------------------------------------------------------------------------|

|                   |          |        |        |                                                                                                   |
|-------------------|----------|--------|--------|---------------------------------------------------------------------------------------------------|
|                   | Male     | Male   |        | female) or a communal breeding aviary hatched.                                                    |
|                   | -        | Pair   | -      |                                                                                                   |
|                   | Embryo   | -      | -      |                                                                                                   |
| Nestling survival |          |        |        |                                                                                                   |
|                   | Female   | Female | Female | Whether or not a nestling that hatched in a cage (contains one male and one female) or a communal |
|                   | Male     | Male   | Male   | breeding aviary survived to independence, i.e. age 35 days.                                       |
|                   | -        | Pair   | -      |                                                                                                   |
|                   | Nestling | -      | -      |                                                                                                   |

---

Individual

Lifespan

|                                                       |   |            |                                                                            |
|-------------------------------------------------------|---|------------|----------------------------------------------------------------------------|
| Individual                                            | - | Individual | The number of days from the date of hatching to the date of natural death. |
| Some missing values were replaced by life-expectancy. |   |            |                                                                            |

---

Note: Traits were measured either in the context of single pairs breeding in a small cage or of multiple pairs breeding communally in a large aviary. Fixed effects (focal) are inbreeding coefficient, age, and early condition (mass at day 8). Random effects (focal) are the variance components explained by female, male or pair identity. 'BLUPs' stands for best linear unbiased predictions, estimated from univariate models where we controlled for significant fixed and random effects. For the offspring trait of embryo survival, female, male and pair identities refer to the genetic parents of the embryo, whereas for nestling survival, female, male and pair identities refer to the social parents that raised the nestling. Cage dimensions, before 2012: 60x40x45 cm (L x W x H), afterwards: 120x40x45 cm. For details of housing conditions see Bolund et al. (2007). A semi-outdoor aviary measured 500x200x200 cm (L x W x H).

863 **Figure 1.** Steps of data analysis from univariate mixed models to multivariate animal models.  
 864 Shown are the goals of the analysis, the model properties, the unit of analysis (i.e. whether  
 865 rows in the data represent single eggs, clutches, individuals in a breeding season, single fixed  
 866 effect estimates, or individuals overall), the software functions used for analysis (for models on  
 867 aggregated levels, ‘weight’ stands for the number of eggs or clutches used for each aggregation,  
 868 whereas in meta-summarization models, weight stands for the multiplicative inverse of the  
 869 standard error of each estimate) and the population abbreviations for data used for the analysis.  
 870 ‘S’, ‘B’, ‘K’, and ‘M’ stand for ‘Seewiesen’, ‘Bielefeld’, ‘Krakow’, and ‘Melbourne’, respectively.  
 871 Number of models conducted within each step with their specific details (e.g. unit, population  
 872 or the model type) used for analysis. ‘A.G.’ stands for ‘additive genetic’.

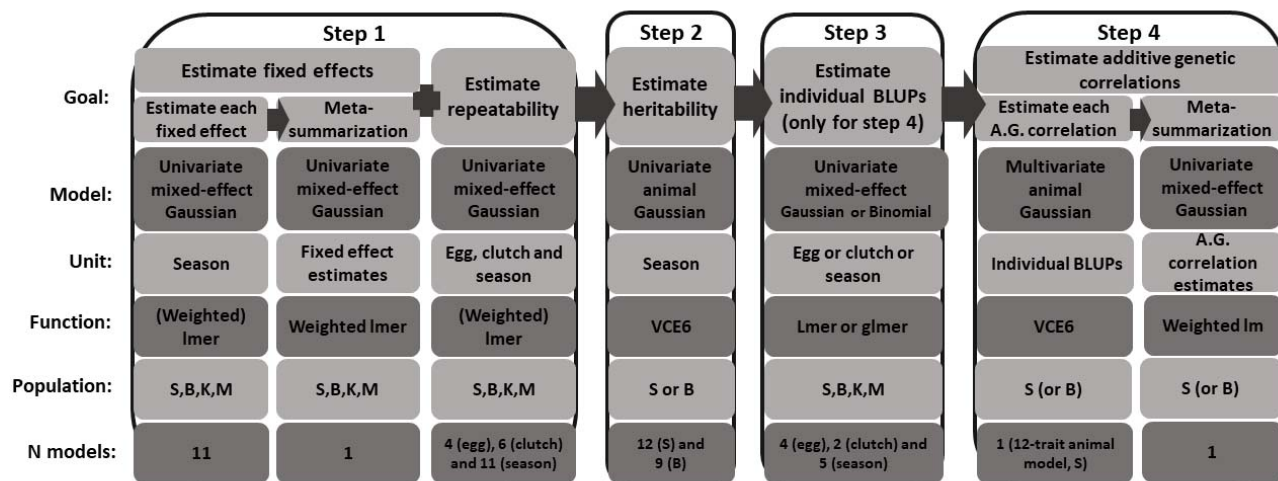

873  
874

875 **Figure 2.** Reproductive performance traits (continuous or count traits in A-C, binomial traits in  
876 D-F) as a function of inbreeding coefficient ( $F_{ped}$ ; A, D), early condition (mass at day 8,  
877 separately for populations that differ in body size (B, E), and age (C, F). Clutch size, fecundity,  
878 siring success, seasonal recruits, and lifespan are continuous or count traits (Z-scaled), whereas  
879 the proportions of eggs fertilized, embryos survived, and nestlings survived are binomial traits.  
880 Note that these are composite figures of all effects that were examined (see fig. A2 for plots of  
881 single traits with absolute trait values), such that the fate of one embryo may be shown twice,  
882 once as a function of the embryo's own  $F_{ped}$  and once as a function of its mother's  $F_{ped}$  (hence  
883 the high sample sizes,  $N_{obs}$ ). The age category zero contains measurements until day 365. Red  
884 lines show smoothed regressions with 95% CIs, circle size (A-C) and bar width (D-F) reflect  
885 sample sizes.

886

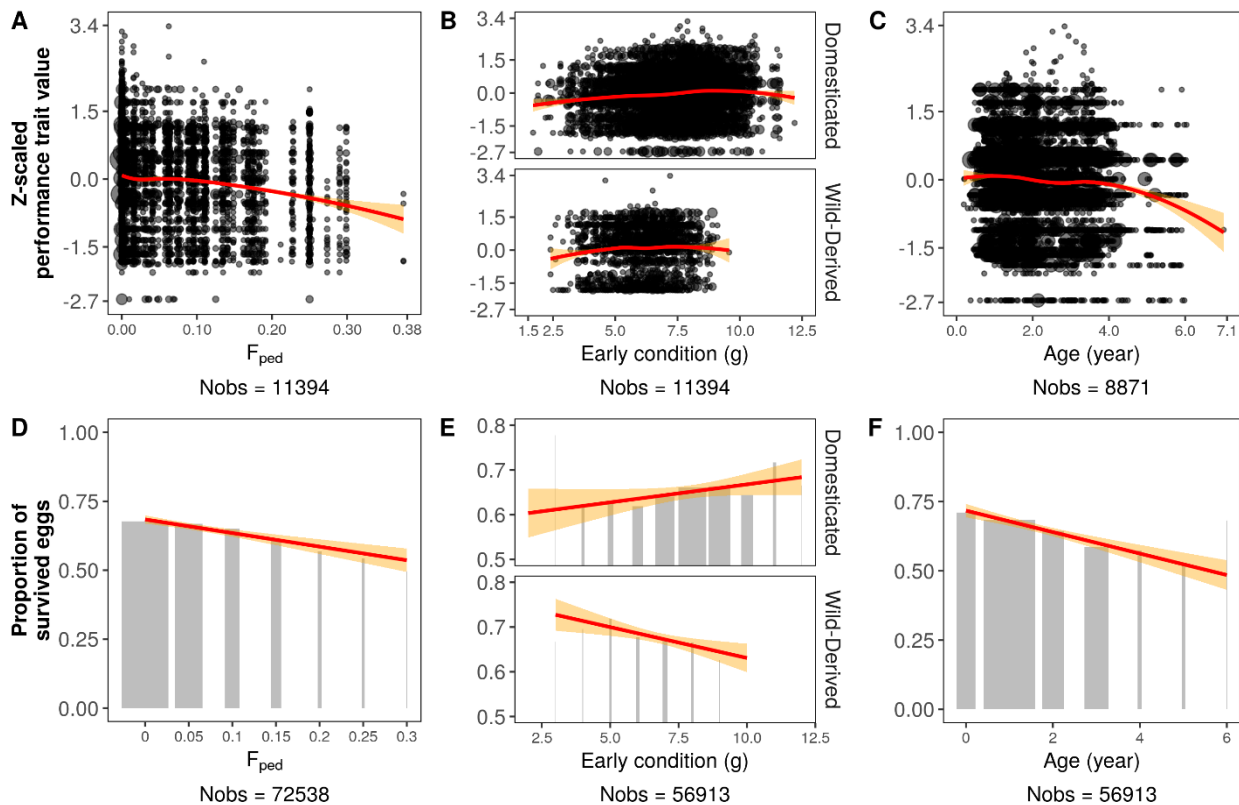

887

888 **Figure 3.** Standardized effect sizes with their 95% confidence intervals for inbreeding ( $F_{ped}$ ), age  
 889 and early condition (mass at day 8) on zebra finch fitness components estimated in univariate  
 890 Gaussian mixed-effect models where all response variables were measured at the level of  
 891 individuals within seasons, and all measurements were Z-scaled (table A3). Note that the effect  
 892 of inbreeding of the offspring on its own mortality was taken from egg-based models. Negative  
 893 effects of condition indicate low fitness of relatively light-weight individuals at 8 days of age.  
 894 Panels separate effects of condition, age and inbreeding of the female (A), the male (B), and the  
 895 individual egg itself (C). Panel (D) shows the meta-summarized effect sizes for reproductive  
 896 performance and lifespan (table A4). The X-axes indicate effect sizes in the form of Pearson  
 897 correlation coefficients.

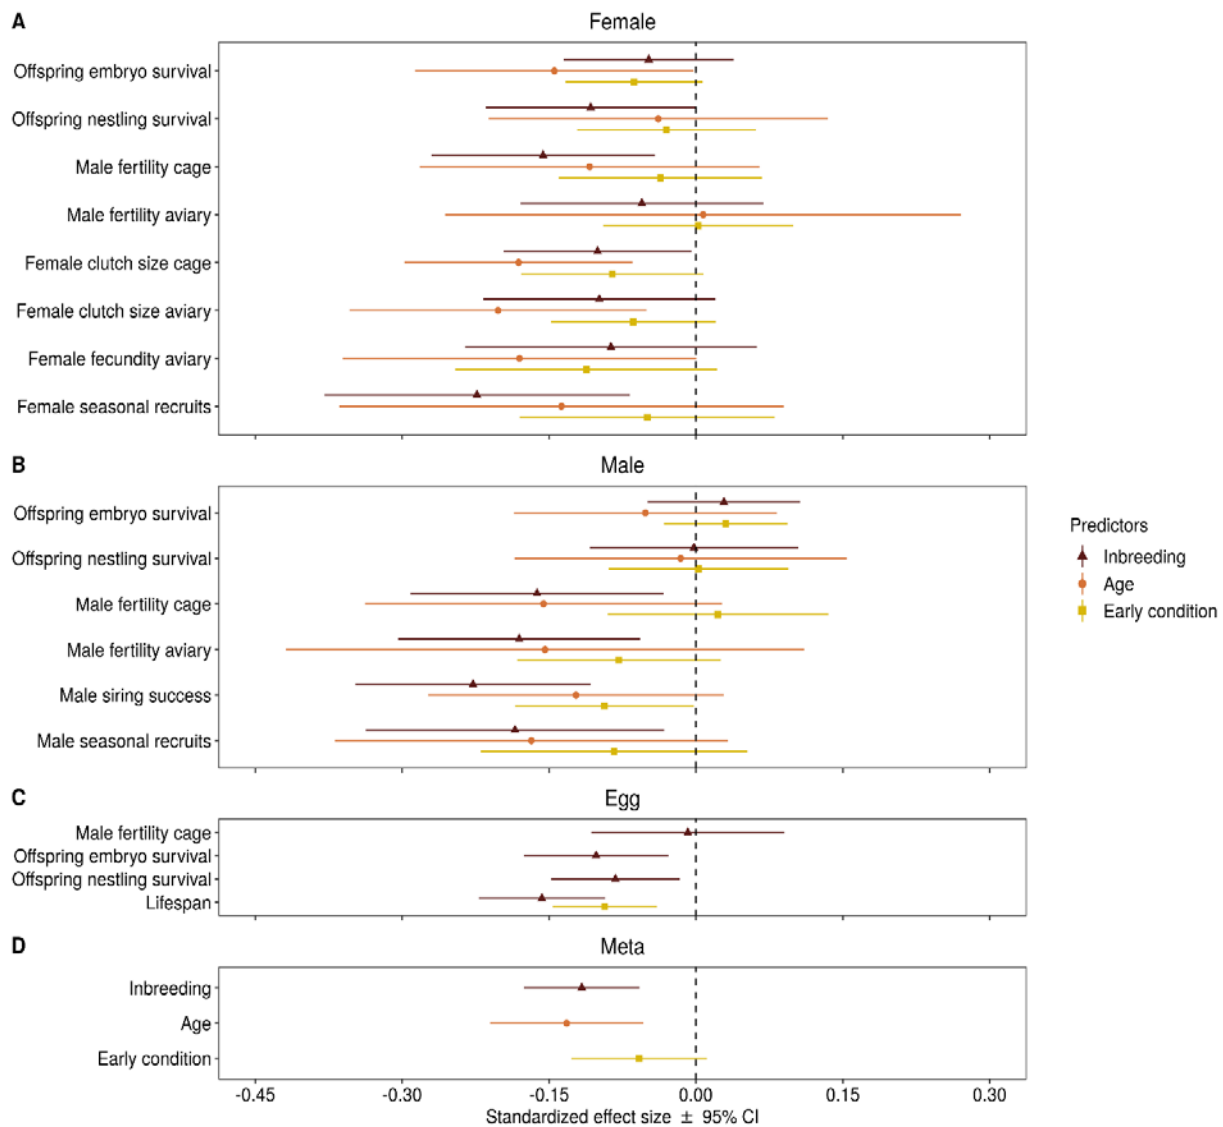

898



900 **Figure 4.** Variance components estimated in univariate Gaussian mixed-effect models (table A5).  
 901 Each dependent trait is shown in a separate panel. Within panels, the x-axis separates models  
 902 according to the unit of analysis, based on either egg fate (Egg), values per clutch (Clutch), or  
 903 values per individual within a breeding season (Season). The y-axis indicates the proportion of  
 904 variance explained by random effects after accounting for fixed effects. ‘Focal fixed effects’  
 905 refers to the total variance explained by inbreeding, age, and early condition combined. For the  
 906 key variance components, numbers show non-significant P-values, otherwise ‘+’ indicates  $P <$   
 907 0.1, ‘\*’ indicates  $P < 0.05$ , ‘\*\*’ indicates  $P < 0.001$ , and ‘\*\*\*’ indicates  $P < 0.0001$ . Note that  
 908 Models of ‘female clutch size aviary’, ‘female fecundity aviary’ and ‘female seasonal recruits’  
 909 were analyzed without ‘Male ID’ and ‘Pair ID’, and likewise ‘male seasonal recruits’ and ‘male  
 910 siring success’ was analyzed without ‘Female ID’ and ‘Pair ID’ because not all birds form a pair  
 911 bond; ‘Male ID’ explained no variance in models of ‘clutch size cage’ and ‘embryo survival’  
 912 while ‘Pair ID’ explained no variance in ‘clutch size cage’ model.

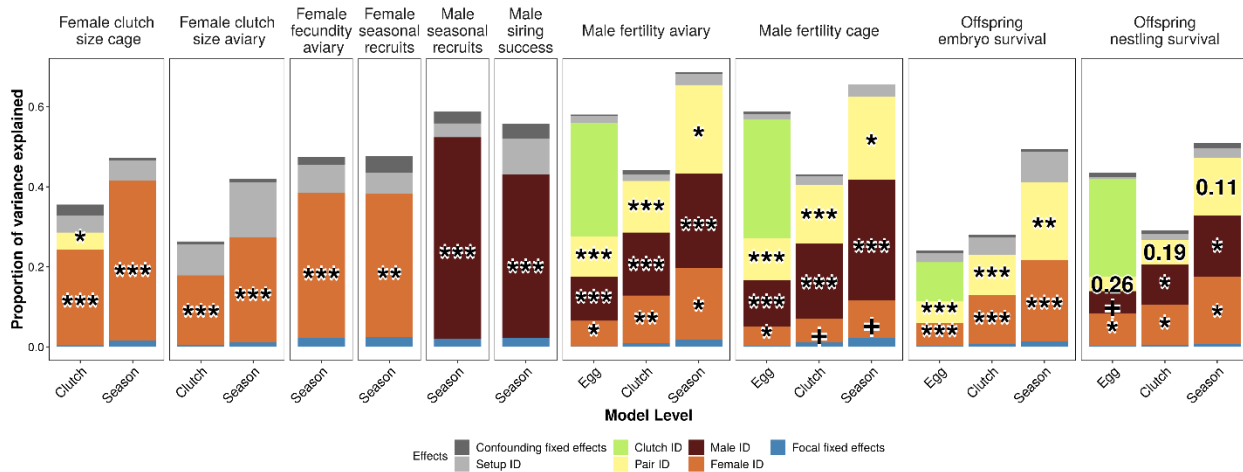

913

914



915 **Figure 5.** G-matrix of reproductive performance traits and lifespan estimated from multivariate  
 916 animal models for the Seewiesen population (shown are estimates from VCE; for estimates of  
 917 MCMCglimm bivariate models see fig. A7; see also figs A6 and A8 for estimates from the  
 918 Bielefeld population; estimates are given in tables A10-A11). (A) Heatmap of additive genetic  
 919 correlations between components of male (M), female (F), and offspring (O) fitness, and life  
 920 span (L). Red indicates a positive genetic correlation between traits while blue indicates a  
 921 negative correlation. Blocks marked in bold emphasize correlations between categories (e.g.  
 922 MF stands for correlations between male and female fitness components). (B) The first two  
 923 principal components of the G-matrix, showing eigenvectors of the 12 fitness components.  
 924 Note that aspects of male fitness do not align with aspects of female and offspring fitness.

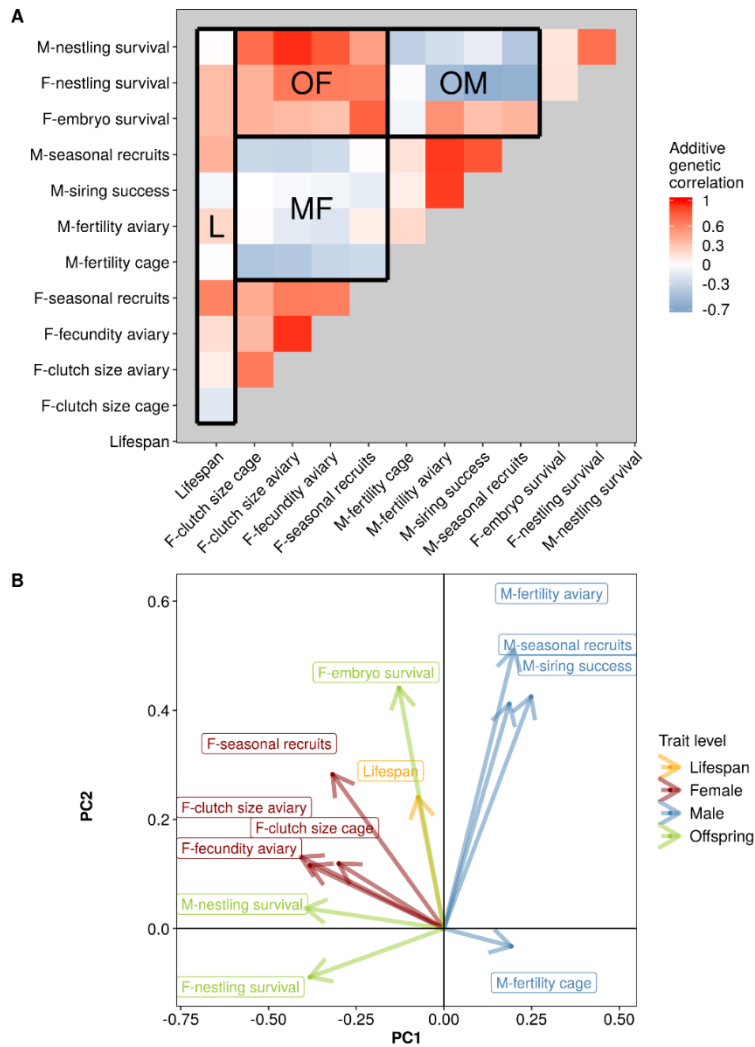

925
